# Supplementary material for: Trends in Neonatal and Postneonatal Respiratory-Related Mortality in the United States, 1999–2020: A National Analysis by Sex, Urbanization, and Region
Source: Research Square preprint supplement (doi:10.21203/rs.3.rs-6696776/v1), 2025-06-17
Supplement: Supplementary file 1 [file 662b54f92ee86a9a48b5f8b8.docx]

| **Mortality** | **Year** | **Deaths** | **CR** | **CR Lower 95%CI** | **CR Upper 95% CI** | **CR Standard Error** |
| --- | --- | --- | --- | --- | --- | --- |
| Neonatal | 1999 | 5247 | 1.33 | 1.29 | 1.36 | 0.02 |
| Neonatal | 2000 | 5142 | 1.27 | 1.23 | 1.3 | 0.02 |
| Neonatal | 2001 | 4929 | 1.22 | 1.19 | 1.26 | 0.02 |
| Neonatal | 2002 | 4928 | 1.23 | 1.19 | 1.26 | 0.02 |
| Neonatal | 2003 | 4794 | 1.17 | 1.14 | 1.21 | 0.02 |
| Neonatal | 2004 | 4851 | 1.18 | 1.15 | 1.21 | 0.02 |
| Neonatal | 2005 | 4939 | 1.19 | 1.16 | 1.23 | 0.02 |
| Neonatal | 2006 | 5082 | 1.19 | 1.16 | 1.22 | 0.02 |
| Neonatal | 2007 | 4893 | 1.13 | 1.1 | 1.17 | 0.02 |
| Neonatal | 2008 | 4506 | 1.06 | 1.03 | 1.09 | 0.02 |
| Neonatal | 2009 | 4246 | 1.03 | 1 | 1.06 | 0.02 |
| Neonatal | 2010 | 4070 | 1.02 | 0.99 | 1.05 | 0.02 |
| Neonatal | 2011 | 3823 | 0.97 | 0.94 | 1 | 0.02 |
| Neonatal | 2012 | 3786 | 0.96 | 0.93 | 0.99 | 0.02 |
| Neonatal | 2013 | 3937 | 1 | 0.97 | 1.03 | 0.02 |
| Neonatal | 2014 | 3890 | 0.98 | 0.94 | 1.01 | 0.02 |
| Neonatal | 2015 | 3969 | 1 | 0.97 | 1.03 | 0.02 |
| Neonatal | 2016 | 4008 | 1.02 | 0.98 | 1.05 | 0.02 |
| Neonatal | 2017 | 3887 | 1.01 | 0.98 | 1.04 | 0.02 |
| Neonatal | 2018 | 3880 | 1.02 | 0.99 | 1.06 | 0.02 |
| Neonatal | 2019 | 3722 | 0.99 | 0.96 | 1.03 | 0.02 |
| Neonatal | 2020 | 3636 | 1.01 | 0.97 | 1.04 | 0.02 |
| Post-neonatal | 1999 | 3300 | 0.83 | 0.81 | 0.86 | 0.01 |
| Post-neonatal | 2000 | 3236 | 0.8 | 0.77 | 0.82 | 0.01 |
| Post-neonatal | 2001 | 2981 | 0.74 | 0.71 | 0.77 | 0.01 |
| Post-neonatal | 2002 | 3051 | 0.76 | 0.73 | 0.79 | 0.01 |
| Post-neonatal | 2003 | 2822 | 0.69 | 0.66 | 0.72 | 0.01 |
| Post-neonatal | 2004 | 2930 | 0.71 | 0.69 | 0.74 | 0.01 |
| Post-neonatal | 2005 | 2853 | 0.69 | 0.66 | 0.71 | 0.01 |
| Post-neonatal | 2006 | 2921 | 0.68 | 0.66 | 0.71 | 0.01 |
| Post-neonatal | 2007 | 2994 | 0.69 | 0.67 | 0.72 | 0.01 |
| Post-neonatal | 2008 | 2848 | 0.67 | 0.65 | 0.7 | 0.01 |
| Post-neonatal | 2009 | 2681 | 0.65 | 0.62 | 0.67 | 0.01 |
| Post-neonatal | 2010 | 2406 | 0.6 | 0.58 | 0.63 | 0.01 |
| Post-neonatal | 2011 | 2216 | 0.56 | 0.54 | 0.58 | 0.01 |
| Post-neonatal | 2012 | 1995 | 0.5 | 0.48 | 0.53 | 0.01 |
| Post-neonatal | 2013 | 1867 | 0.47 | 0.45 | 0.5 | 0.01 |
| Post-neonatal | 2014 | 1884 | 0.47 | 0.45 | 0.49 | 0.01 |
| Post-neonatal | 2015 | 1909 | 0.48 | 0.46 | 0.5 | 0.01 |
| Post-neonatal | 2016 | 1836 | 0.47 | 0.44 | 0.49 | 0.01 |
| Post-neonatal | 2017 | 1773 | 0.46 | 0.44 | 0.48 | 0.01 |
| Post-neonatal | 2018 | 1740 | 0.46 | 0.44 | 0.48 | 0.01 |
| Post-neonatal | 2019 | 1664 | 0.44 | 0.42 | 0.47 | 0.01 |
| Post-neonatal | 2020 | 1716 | 0.47 | 0.45 | 0.5 | 0.01 |
| **Cohort** | **Lower Endpoint** | **Upper Endpoint** | **APC** | **Lower 95% CI** | **Upper 95% CI** | **P-value** |
| Neonatal - 3 Joinpoints | 1999 | 2001 | -4.2527 | -8.6641 | 0.3717 | 0.067499 |
| Neonatal - 3 Joinpoints | 2001 | 2006 | -0.7985 | -2.3789 | 0.8075 | 0.295362 |
| Neonatal - 3 Joinpoints | 2006 | 2011 | -3.6582* | -5.3866 | -1.8981 | 0.000857 |
| Neonatal - 3 Joinpoints | 2011 | 2020 | 0.5359 | -0.0301 | 1.1051 | 0.061324 |
| Post-neonatal - 3 Joinpoints | 1999 | 2003 | -3.7868* | -5.4564 | -2.0877 | 0.000508 |
| Post-neonatal - 3 Joinpoints | 2003 | 2009 | -1.2167 | -2.6087 | 0.1952 | 0.084161 |
| Post-neonatal - 3 Joinpoints | 2009 | 2013 | -8.0686* | -11.6797 | -4.3099 | 0.00074 |
| Post-neonatal - 3 Joinpoints | 2013 | 2020 | -0.3818 | -1.6227 | 0.8748 | 0.515671 |
| **Cohort** | **Lower Endpoint** | **Upper Endpoint** | **AAPC** | **Lower 95%CI** | **Upper 95%CI** | **P-value** |
| Neonatal - 3 Joinpoints | 1999 | 2020 | -1.2551* | -1.9295 | -0.576 | 0.000304 |
| Post-neonatal - 3 Joinpoints | 1999 | 2020 | -2.7758* | -3.6516 | -1.8919 | < 0.000001 |

**Supplementary Table 1**: Respiratory related mortality rates stratified by year in the United States 1999-2020. CR=Crude Rate; APC=Annual Percentage Change; AAPC=Average Annual Percentage Change; CI=Confidence Interval.

| **Mortality** | **Gender** | **Year** | **Deaths** | **CR** | | **CR Lower 95%CI** | **CR Upper 95% CI** |
| --- | --- | --- | --- | --- | --- | --- | --- |
| Neonatal | Female | 1999 | 2244 | 1.16 | 1.11 | | 1.21 |
| Neonatal | Female | 2000 | 2115 | 1.07 | 1.02 | | 1.11 |
| Neonatal | Female | 2001 | 2114 | 1.07 | 1.03 | | 1.12 |
| Neonatal | Female | 2002 | 2093 | 1.07 | 1.02 | | 1.11 |
| Neonatal | Female | 2003 | 2002 | 1 | 0.96 | | 1.05 |
| Neonatal | Female | 2004 | 2027 | 1.01 | 0.97 | | 1.05 |
| Neonatal | Female | 2005 | 2089 | 1.03 | 0.99 | | 1.08 |
| Neonatal | Female | 2006 | 2161 | 1.04 | 0.99 | | 1.08 |
| Neonatal | Female | 2007 | 2073 | 0.98 | 0.94 | | 1.03 |
| Neonatal | Female | 2008 | 1896 | 0.91 | 0.87 | | 0.96 |
| Neonatal | Female | 2009 | 1813 | 0.9 | 0.86 | | 0.94 |
| Neonatal | Female | 2010 | 1763 | 0.9 | 0.86 | | 0.95 |
| Neonatal | Female | 2011 | 1628 | 0.84 | 0.8 | | 0.88 |
| Neonatal | Female | 2012 | 1679 | 0.87 | 0.83 | | 0.91 |
| Neonatal | Female | 2013 | 1751 | 0.91 | 0.87 | | 0.96 |
| Neonatal | Female | 2014 | 1722 | 0.88 | 0.84 | | 0.93 |
| Neonatal | Female | 2015 | 1753 | 0.9 | 0.86 | | 0.94 |
| Neonatal | Female | 2016 | 1771 | 0.92 | 0.88 | | 0.96 |
| Neonatal | Female | 2017 | 1699 | 0.9 | 0.86 | | 0.95 |
| Neonatal | Female | 2018 | 1696 | 0.92 | 0.87 | | 0.96 |
| Neonatal | Female | 2019 | 1588 | 0.87 | 0.83 | | 0.91 |
| Neonatal | Female | 2020 | 1561 | 0.88 | 0.84 | | 0.93 |
| Neonatal | Male | 1999 | 3003 | 1.48 | 1.43 | | 1.53 |
| Neonatal | Male | 2000 | 3027 | 1.46 | 1.41 | | 1.51 |
| Neonatal | Male | 2001 | 2815 | 1.37 | 1.32 | | 1.42 |
| Neonatal | Male | 2002 | 2835 | 1.38 | 1.33 | | 1.43 |
| Neonatal | Male | 2003 | 2792 | 1.33 | 1.28 | | 1.38 |
| Neonatal | Male | 2004 | 2824 | 1.34 | 1.29 | | 1.39 |
| Neonatal | Male | 2005 | 2850 | 1.34 | 1.3 | | 1.39 |
| Neonatal | Male | 2006 | 2921 | 1.34 | 1.29 | | 1.39 |
| Neonatal | Male | 2007 | 2820 | 1.28 | 1.23 | | 1.32 |
| Neonatal | Male | 2008 | 2610 | 1.2 | 1.15 | | 1.25 |
| Neonatal | Male | 2009 | 2433 | 1.15 | 1.11 | | 1.2 |
| Neonatal | Male | 2010 | 2307 | 1.13 | 1.08 | | 1.17 |
| Neonatal | Male | 2011 | 2195 | 1.08 | 1.04 | | 1.13 |
| Neonatal | Male | 2012 | 2107 | 1.04 | 1 | | 1.09 |
| Neonatal | Male | 2013 | 2186 | 1.09 | 1.04 | | 1.13 |
| Neonatal | Male | 2014 | 2168 | 1.06 | 1.02 | | 1.11 |
| Neonatal | Male | 2015 | 2216 | 1.09 | 1.04 | | 1.13 |
| Neonatal | Male | 2016 | 2237 | 1.11 | 1.06 | | 1.15 |
| Neonatal | Male | 2017 | 2188 | 1.11 | 1.06 | | 1.16 |
| Neonatal | Male | 2018 | 2184 | 1.13 | 1.08 | | 1.17 |
| Neonatal | Male | 2019 | 2134 | 1.11 | 1.07 | | 1.16 |
| Neonatal | Male | 2020 | 2075 | 1.12 | 1.07 | | 1.17 |
| Post-neonatal | Female | 1999 | 1364 | 0.71 | 0.67 | | 0.74 |
| Post-neonatal | Female | 2000 | 1315 | 0.66 | 0.63 | | 0.7 |
| Post-neonatal | Female | 2001 | 1235 | 0.63 | 0.59 | | 0.66 |
| Post-neonatal | Female | 2002 | 1230 | 0.63 | 0.59 | | 0.66 |
| Post-neonatal | Female | 2003 | 1146 | 0.57 | 0.54 | | 0.61 |
| Post-neonatal | Female | 2004 | 1192 | 0.59 | 0.56 | | 0.63 |
| Post-neonatal | Female | 2005 | 1115 | 0.55 | 0.52 | | 0.58 |
| Post-neonatal | Female | 2006 | 1238 | 0.59 | 0.56 | | 0.63 |
| Post-neonatal | Female | 2007 | 1244 | 0.59 | 0.56 | | 0.62 |
| Post-neonatal | Female | 2008 | 1183 | 0.57 | 0.54 | | 0.6 |
| Post-neonatal | Female | 2009 | 1108 | 0.55 | 0.52 | | 0.58 |
| Post-neonatal | Female | 2010 | 993 | 0.51 | 0.48 | | 0.54 |
| Post-neonatal | Female | 2011 | 910 | 0.47 | 0.44 | | 0.5 |
| Post-neonatal | Female | 2012 | 863 | 0.45 | 0.42 | | 0.48 |
| Post-neonatal | Female | 2013 | 785 | 0.41 | 0.38 | | 0.44 |
| Post-neonatal | Female | 2014 | 773 | 0.4 | 0.37 | | 0.42 |
| Post-neonatal | Female | 2015 | 771 | 0.4 | 0.37 | | 0.42 |
| Post-neonatal | Female | 2016 | 779 | 0.4 | 0.38 | | 0.43 |
| Post-neonatal | Female | 2017 | 725 | 0.39 | 0.36 | | 0.41 |
| Post-neonatal | Female | 2018 | 768 | 0.41 | 0.39 | | 0.44 |
| Post-neonatal | Female | 2019 | 709 | 0.39 | 0.36 | | 0.42 |
| Post-neonatal | Female | 2020 | 742 | 0.42 | 0.39 | | 0.45 |
| Post-neonatal | Male | 1999 | 1936 | 0.96 | 0.91 | | 1 |
| Post-neonatal | Male | 2000 | 1921 | 0.92 | 0.88 | | 0.97 |
| Post-neonatal | Male | 2001 | 1746 | 0.85 | 0.81 | | 0.89 |
| Post-neonatal | Male | 2002 | 1821 | 0.88 | 0.84 | | 0.93 |
| Post-neonatal | Male | 2003 | 1676 | 0.8 | 0.76 | | 0.84 |
| Post-neonatal | Male | 2004 | 1738 | 0.83 | 0.79 | | 0.86 |
| Post-neonatal | Male | 2005 | 1738 | 0.82 | 0.78 | | 0.86 |
| Post-neonatal | Male | 2006 | 1683 | 0.77 | 0.73 | | 0.81 |
| Post-neonatal | Male | 2007 | 1750 | 0.79 | 0.76 | | 0.83 |
| Post-neonatal | Male | 2008 | 1665 | 0.77 | 0.73 | | 0.8 |
| Post-neonatal | Male | 2009 | 1573 | 0.74 | 0.71 | | 0.78 |
| Post-neonatal | Male | 2010 | 1413 | 0.69 | 0.65 | | 0.73 |
| Post-neonatal | Male | 2011 | 1306 | 0.65 | 0.61 | | 0.68 |
| Post-neonatal | Male | 2012 | 1132 | 0.56 | 0.53 | | 0.59 |
| Post-neonatal | Male | 2013 | 1082 | 0.54 | 0.51 | | 0.57 |
| Post-neonatal | Male | 2014 | 1111 | 0.54 | 0.51 | | 0.58 |
| Post-neonatal | Male | 2015 | 1138 | 0.56 | 0.53 | | 0.59 |
| Post-neonatal | Male | 2016 | 1057 | 0.52 | 0.49 | | 0.56 |
| Post-neonatal | Male | 2017 | 1048 | 0.53 | 0.5 | | 0.56 |
| Post-neonatal | Male | 2018 | 972 | 0.5 | 0.47 | | 0.53 |
| Post-neonatal | Male | 2019 | 955 | 0.5 | 0.47 | | 0.53 |
| Post-neonatal | Male | 2020 | 974 | 0.53 | 0.49 | | 0.56 |
| **Cohort** | **Lower Endpoint** | **Upper Endpoint** | **APC** | **Lower 95%CI** | **Upper 95%CI** | | **P-value** |
| Neonatal / Female - 1 Joinpoint | 1999 | 2011 | -2.0463* | -2.5395 | -1.5506 | | < 0.000001 |
| Neonatal / Female - 1 Joinpoint | 2011 | 2020 | 0.2285 | -0.6559 | 1.1209 | | 0.593923 |
| Neonatal / Male - 3 Joinpoints | 1999 | 2003 | -2.5905* | -4.3696 | -0.7782 | | 0.009513 |
| Neonatal / Male - 3 Joinpoints | 2003 | 2006 | 0.0566 | -5.9644 | 6.4633 | | 0.984337 |
| Neonatal / Male - 3 Joinpoints | 2006 | 2011 | -4.4781* | -5.8649 | -3.0708 | | 0.000026 |
| Neonatal / Male - 3 Joinpoints | 2011 | 2020 | 0.6705* | 0.2034 | 1.1398 | | 0.009041 |
| Post-neonatal / Female - 3 Joinpoints | 1999 | 2003 | -4.8056* | -7.2245 | -2.3237 | | 0.001457 |
| Post-neonatal / Female - 3 Joinpoints | 2003 | 2008 | 0.1811 | -2.6966 | 3.1438 | | 0.893798 |
| Post-neonatal / Female - 3 Joinpoints | 2008 | 2013 | -7.0161* | -10.1774 | -3.7435 | | 0.00073 |
| Post-neonatal / Female - 3 Joinpoints | 2013 | 2020 | -0.3241 | -1.372 | 0.7349 | | 0.512939 |
| Post-neonatal / Male - 2 Joinpoints | 1999 | 2009 | -2.2619* | -2.9134 | -1.606 | | 0.000004 |
| Post-neonatal / Male - 2 Joinpoints | 2009 | 2013 | -7.4440* | -12.7335 | -1.8338 | | 0.01365 |
| Post-neonatal / Male - 2 Joinpoints | 2013 | 2020 | -0.841 | -2.6425 | 0.9938 | | 0.33994 |
| **Cohort** | **Lower Endpoint** | **Upper Endpoint** | **AAPC** | **Lower 95%CI** | **Upper 95%CI** | | **P-value** |
| Neonatal / Female - 1 Joinpoint | 1999 | 2020 | -1.0778* | -1.5151 | -0.6385 | | 0.000002 |
| Neonatal / Male - 3 Joinpoints | 1999 | 2020 | -1.2879* | -2.1931 | -0.3743 | | 0.005821 |
| Post-neonatal / Female - 3 Joinpoints | 1999 | 2020 | -2.6981* | -3.762 | -1.6225 | | 0.000001 |
| Post-neonatal / Male - 2 Joinpoints | 1999 | 2020 | -2.8043* | -3.9661 | -1.6286 | | 0.000004 |

**Supplementary Table 2**: Respiratory related mortality rates stratified by gender in the United States 1999-2020. CR=Crude Rate; APC=Annual Percentage Change; AAPC=Average Annual Percentage Change; CI=Confidence Interval.

| **Mortality** | **Urbanization** | **Year** | **Deaths** | **CR** | **CR Lower 95%CI** | **CR Upper 95% CI** |
| --- | --- | --- | --- | --- | --- | --- |
| Neonatal | Metropolitan | 1999 | 4423 | 1.3 | 1.27 | 1.34 |
| Neonatal | Metropolitan | 2000 | 4332 | 1.24 | 1.21 | 1.28 |
| Neonatal | Metropolitan | 2001 | 4185 | 1.21 | 1.17 | 1.25 |
| Neonatal | Metropolitan | 2002 | 4180 | 1.21 | 1.17 | 1.24 |
| Neonatal | Metropolitan | 2003 | 4070 | 1.15 | 1.12 | 1.19 |
| Neonatal | Metropolitan | 2004 | 4080 | 1.15 | 1.12 | 1.19 |
| Neonatal | Metropolitan | 2005 | 4172 | 1.17 | 1.14 | 1.21 |
| Neonatal | Metropolitan | 2006 | 4355 | 1.19 | 1.15 | 1.22 |
| Neonatal | Metropolitan | 2007 | 4082 | 1.1 | 1.06 | 1.13 |
| Neonatal | Metropolitan | 2008 | 3814 | 1.04 | 1.01 | 1.08 |
| Neonatal | Metropolitan | 2009 | 3607 | 1.01 | 0.98 | 1.05 |
| Neonatal | Metropolitan | 2010 | 3441 | 1 | 0.96 | 1.03 |
| Neonatal | Metropolitan | 2011 | 3168 | 0.93 | 0.9 | 0.96 |
| Neonatal | Metropolitan | 2012 | 3174 | 0.93 | 0.9 | 0.96 |
| Neonatal | Metropolitan | 2013 | 3280 | 0.97 | 0.93 | 1 |
| Neonatal | Metropolitan | 2014 | 3322 | 0.96 | 0.93 | 1 |
| Neonatal | Metropolitan | 2015 | 3351 | 0.97 | 0.94 | 1.01 |
| Neonatal | Metropolitan | 2016 | 3392 | 0.99 | 0.96 | 1.03 |
| Neonatal | Metropolitan | 2017 | 3313 | 0.99 | 0.96 | 1.03 |
| Neonatal | Metropolitan | 2018 | 3292 | 1 | 0.97 | 1.04 |
| Neonatal | Metropolitan | 2019 | 3157 | 0.97 | 0.94 | 1.01 |
| Neonatal | Metropolitan | 2020 | 3081 | 0.99 | 0.95 | 1.02 |
| Neonatal | Non-Metropolitan | 1999 | 824 | 1.45 | 1.35 | 1.55 |
| Neonatal | Non-Metropolitan | 2000 | 810 | 1.41 | 1.31 | 1.5 |
| Neonatal | Non-Metropolitan | 2001 | 744 | 1.32 | 1.22 | 1.41 |
| Neonatal | Non-Metropolitan | 2002 | 748 | 1.34 | 1.24 | 1.43 |
| Neonatal | Non-Metropolitan | 2003 | 724 | 1.28 | 1.19 | 1.37 |
| Neonatal | Non-Metropolitan | 2004 | 771 | 1.36 | 1.26 | 1.45 |
| Neonatal | Non-Metropolitan | 2005 | 767 | 1.33 | 1.24 | 1.43 |
| Neonatal | Non-Metropolitan | 2006 | 727 | 1.23 | 1.14 | 1.32 |
| Neonatal | Non-Metropolitan | 2007 | 811 | 1.36 | 1.26 | 1.45 |
| Neonatal | Non-Metropolitan | 2008 | 692 | 1.17 | 1.09 | 1.26 |
| Neonatal | Non-Metropolitan | 2009 | 639 | 1.12 | 1.03 | 1.2 |
| Neonatal | Non-Metropolitan | 2010 | 629 | 1.14 | 1.05 | 1.23 |
| Neonatal | Non-Metropolitan | 2011 | 655 | 1.21 | 1.12 | 1.3 |
| Neonatal | Non-Metropolitan | 2012 | 612 | 1.13 | 1.04 | 1.22 |
| Neonatal | Non-Metropolitan | 2013 | 657 | 1.22 | 1.13 | 1.31 |
| Neonatal | Non-Metropolitan | 2014 | 568 | 1.05 | 0.96 | 1.14 |
| Neonatal | Non-Metropolitan | 2015 | 618 | 1.14 | 1.05 | 1.23 |
| Neonatal | Non-Metropolitan | 2016 | 616 | 1.16 | 1.07 | 1.25 |
| Neonatal | Non-Metropolitan | 2017 | 574 | 1.1 | 1.01 | 1.19 |
| Neonatal | Non-Metropolitan | 2018 | 588 | 1.15 | 1.05 | 1.24 |
| Neonatal | Non-Metropolitan | 2019 | 565 | 1.12 | 1.02 | 1.21 |
| Neonatal | Non-Metropolitan | 2020 | 555 | 1.13 | 1.04 | 1.23 |
| Post-neonatal | Metropolitan | 1999 | 2718 | 0.8 | 0.77 | 0.83 |
| Post-neonatal | Metropolitan | 2000 | 2567 | 0.74 | 0.71 | 0.77 |
| Post-neonatal | Metropolitan | 2001 | 2403 | 0.69 | 0.67 | 0.72 |
| Post-neonatal | Metropolitan | 2002 | 2453 | 0.71 | 0.68 | 0.74 |
| Post-neonatal | Metropolitan | 2003 | 2256 | 0.64 | 0.61 | 0.67 |
| Post-neonatal | Metropolitan | 2004 | 2384 | 0.67 | 0.65 | 0.7 |
| Post-neonatal | Metropolitan | 2005 | 2288 | 0.64 | 0.62 | 0.67 |
| Post-neonatal | Metropolitan | 2006 | 2286 | 0.62 | 0.6 | 0.65 |
| Post-neonatal | Metropolitan | 2007 | 2414 | 0.65 | 0.62 | 0.68 |
| Post-neonatal | Metropolitan | 2008 | 2320 | 0.63 | 0.61 | 0.66 |
| Post-neonatal | Metropolitan | 2009 | 2135 | 0.6 | 0.57 | 0.63 |
| Post-neonatal | Metropolitan | 2010 | 1896 | 0.55 | 0.52 | 0.57 |
| Post-neonatal | Metropolitan | 2011 | 1814 | 0.53 | 0.51 | 0.56 |
| Post-neonatal | Metropolitan | 2012 | 1597 | 0.47 | 0.45 | 0.49 |
| Post-neonatal | Metropolitan | 2013 | 1492 | 0.44 | 0.42 | 0.46 |
| Post-neonatal | Metropolitan | 2014 | 1503 | 0.44 | 0.41 | 0.46 |
| Post-neonatal | Metropolitan | 2015 | 1531 | 0.45 | 0.42 | 0.47 |
| Post-neonatal | Metropolitan | 2016 | 1445 | 0.42 | 0.4 | 0.45 |
| Post-neonatal | Metropolitan | 2017 | 1482 | 0.44 | 0.42 | 0.47 |
| Post-neonatal | Metropolitan | 2018 | 1447 | 0.44 | 0.42 | 0.46 |
| Post-neonatal | Metropolitan | 2019 | 1369 | 0.42 | 0.4 | 0.44 |
| Post-neonatal | Metropolitan | 2020 | 1412 | 0.45 | 0.43 | 0.48 |
| Post-neonatal | Non-Metropolitan | 1999 | 582 | 1.03 | 0.94 | 1.11 |
| Post-neonatal | Non-Metropolitan | 2000 | 669 | 1.16 | 1.07 | 1.25 |
| Post-neonatal | Non-Metropolitan | 2001 | 578 | 1.02 | 0.94 | 1.11 |
| Post-neonatal | Non-Metropolitan | 2002 | 598 | 1.07 | 0.98 | 1.15 |
| Post-neonatal | Non-Metropolitan | 2003 | 566 | 1 | 0.92 | 1.08 |
| Post-neonatal | Non-Metropolitan | 2004 | 546 | 0.96 | 0.88 | 1.04 |
| Post-neonatal | Non-Metropolitan | 2005 | 565 | 0.98 | 0.9 | 1.06 |
| Post-neonatal | Non-Metropolitan | 2006 | 635 | 1.07 | 0.99 | 1.16 |
| Post-neonatal | Non-Metropolitan | 2007 | 580 | 0.97 | 0.89 | 1.05 |
| Post-neonatal | Non-Metropolitan | 2008 | 528 | 0.9 | 0.82 | 0.97 |
| Post-neonatal | Non-Metropolitan | 2009 | 546 | 0.96 | 0.88 | 1.04 |
| Post-neonatal | Non-Metropolitan | 2010 | 510 | 0.93 | 0.85 | 1.01 |
| Post-neonatal | Non-Metropolitan | 2011 | 402 | 0.74 | 0.67 | 0.81 |
| Post-neonatal | Non-Metropolitan | 2012 | 398 | 0.74 | 0.66 | 0.81 |
| Post-neonatal | Non-Metropolitan | 2013 | 375 | 0.7 | 0.62 | 0.77 |
| Post-neonatal | Non-Metropolitan | 2014 | 381 | 0.7 | 0.63 | 0.78 |
| Post-neonatal | Non-Metropolitan | 2015 | 378 | 0.7 | 0.63 | 0.77 |
| Post-neonatal | Non-Metropolitan | 2016 | 391 | 0.73 | 0.66 | 0.81 |
| Post-neonatal | Non-Metropolitan | 2017 | 291 | 0.56 | 0.49 | 0.62 |
| Post-neonatal | Non-Metropolitan | 2018 | 293 | 0.57 | 0.51 | 0.64 |
| Post-neonatal | Non-Metropolitan | 2019 | 295 | 0.58 | 0.52 | 0.65 |
| Post-neonatal | Non-Metropolitan | 2020 | 304 | 0.62 | 0.55 | 0.69 |
| **Cohort** | **Lower Endpoint** | **Upper Endpoint** | **APC** | **Lower 95%CI** | **Upper 95%CI** | **P-value** |
| Neonatal / Metropolitan - 3 Joinpoints | 1999 | 2003 | -2.7152* | -3.9986 | -1.4147 | 0.000813 |
| Neonatal / Metropolitan - 3 Joinpoints | 2003 | 2006 | 0.2834 | -4.1573 | 4.9299 | 0.893094 |
| Neonatal / Metropolitan - 3 Joinpoints | 2006 | 2011 | -4.2314* | -5.7404 | -2.6982 | 0.00009 |
| Neonatal / Metropolitan - 3 Joinpoints | 2011 | 2020 | 0.7166* | 0.218 | 1.2177 | 0.008974 |
| Neonatal / Non-Metropolitan - 0 Joinpoints | 1999 | 2020 | -1.2462* | -1.6066 | -0.8844 | 0.000001 |
| Post-neonatal / Metropolitan - 2 Joinpoints | 1999 | 2009 | -2.0724* | -2.8545 | -1.2841 | 0.000065 |
| Post-neonatal / Metropolitan - 2 Joinpoints | 2009 | 2013 | -7.4794* | -13.0404 | -1.5627 | 0.017607 |
| Post-neonatal / Metropolitan - 2 Joinpoints | 2013 | 2020 | -0.1424 | -2.0273 | 1.7788 | 0.874872 |
| Post-neonatal / Non-Metropolitan - 0 Joinpoints | 1999 | 2020 | -3.1816* | -3.7722 | -2.5874 | < 0.000001 |
| **Cohort** | **Lower Endpoint** | **Upper Endpoint** | **AAPC** | **Lower 95%CI** | **Upper 95%CI** | **P-Value** |
| Neonatal / Metropolitan - 3 Joinpoints | 1999 | 2020 | -1.2000* | -1.918 | -0.4768 | 0.001178 |
| Neonatal / Non-Metropolitan - 0 Joinpoints | 1999 | 2020 | -1.2462* | -1.6066 | -0.8844 | 0.000001 |
| Post-neonatal / Metropolitan - 2 Joinpoints | 1999 | 2020 | -2.4939* | -3.7281 | -1.2437 | 0.000102 |
| Post-neonatal / Non-Metropolitan - 0 Joinpoints | 1999 | 2020 | -3.1816* | -3.7722 | -2.5874 | < 0.000001 |

**Supplementary Table 3**: Respiratory related mortality rates stratified by urbanization in the United States 1999-2020. CR=Crude Rate; APC=Annual Percentage Change; AAPC=Average Annual Percentage Change; CI=Confidence Interval.

| **Mortality** | **Census Region** | **Year** | **Deaths** | **CR** | **CR Lower 95%CI** | **CR Upper 95% CI** |
| --- | --- | --- | --- | --- | --- | --- |
| Neonatal | Census Region 1: Northeast | 1999 | 850 | 1.24 | 1.16 | 1.32 |
| Neonatal | Census Region 1: Northeast | 2000 | 827 | 1.19 | 1.11 | 1.28 |
| Neonatal | Census Region 1: Northeast | 2001 | 735 | 1.07 | 1 | 1.15 |
| Neonatal | Census Region 1: Northeast | 2002 | 775 | 1.14 | 1.06 | 1.22 |
| Neonatal | Census Region 1: Northeast | 2003 | 713 | 1.04 | 0.96 | 1.11 |
| Neonatal | Census Region 1: Northeast | 2004 | 711 | 1.05 | 0.97 | 1.13 |
| Neonatal | Census Region 1: Northeast | 2005 | 770 | 1.15 | 1.07 | 1.23 |
| Neonatal | Census Region 1: Northeast | 2006 | 741 | 1.09 | 1.01 | 1.17 |
| Neonatal | Census Region 1: Northeast | 2007 | 727 | 1.06 | 0.98 | 1.14 |
| Neonatal | Census Region 1: Northeast | 2008 | 645 | 0.95 | 0.88 | 1.03 |
| Neonatal | Census Region 1: Northeast | 2009 | 605 | 0.91 | 0.84 | 0.98 |
| Neonatal | Census Region 1: Northeast | 2010 | 614 | 0.95 | 0.87 | 1.02 |
| Neonatal | Census Region 1: Northeast | 2011 | 561 | 0.87 | 0.8 | 0.94 |
| Neonatal | Census Region 1: Northeast | 2012 | 539 | 0.84 | 0.77 | 0.92 |
| Neonatal | Census Region 1: Northeast | 2013 | 562 | 0.89 | 0.82 | 0.97 |
| Neonatal | Census Region 1: Northeast | 2014 | 511 | 0.81 | 0.74 | 0.88 |
| Neonatal | Census Region 1: Northeast | 2015 | 555 | 0.88 | 0.81 | 0.95 |
| Neonatal | Census Region 1: Northeast | 2016 | 509 | 0.81 | 0.74 | 0.88 |
| Neonatal | Census Region 1: Northeast | 2017 | 493 | 0.8 | 0.73 | 0.87 |
| Neonatal | Census Region 1: Northeast | 2018 | 509 | 0.84 | 0.77 | 0.91 |
| Neonatal | Census Region 1: Northeast | 2019 | 545 | 0.91 | 0.84 | 0.99 |
| Neonatal | Census Region 1: Northeast | 2020 | 500 | 0.87 | 0.79 | 0.94 |
| Neonatal | Census Region 2: Midwest | 1999 | 1192 | 1.35 | 1.27 | 1.43 |
| Neonatal | Census Region 2: Midwest | 2000 | 1145 | 1.27 | 1.2 | 1.35 |
| Neonatal | Census Region 2: Midwest | 2001 | 1127 | 1.27 | 1.2 | 1.34 |
| Neonatal | Census Region 2: Midwest | 2002 | 1059 | 1.21 | 1.13 | 1.28 |
| Neonatal | Census Region 2: Midwest | 2003 | 1076 | 1.21 | 1.14 | 1.28 |
| Neonatal | Census Region 2: Midwest | 2004 | 1012 | 1.14 | 1.07 | 1.21 |
| Neonatal | Census Region 2: Midwest | 2005 | 1007 | 1.13 | 1.06 | 1.2 |
| Neonatal | Census Region 2: Midwest | 2006 | 1014 | 1.12 | 1.05 | 1.19 |
| Neonatal | Census Region 2: Midwest | 2007 | 975 | 1.08 | 1.01 | 1.14 |
| Neonatal | Census Region 2: Midwest | 2008 | 949 | 1.06 | 1 | 1.13 |
| Neonatal | Census Region 2: Midwest | 2009 | 853 | 0.98 | 0.92 | 1.05 |
| Neonatal | Census Region 2: Midwest | 2010 | 884 | 1.05 | 0.98 | 1.12 |
| Neonatal | Census Region 2: Midwest | 2011 | 761 | 0.91 | 0.85 | 0.98 |
| Neonatal | Census Region 2: Midwest | 2012 | 823 | 0.99 | 0.92 | 1.06 |
| Neonatal | Census Region 2: Midwest | 2013 | 823 | 0.99 | 0.92 | 1.06 |
| Neonatal | Census Region 2: Midwest | 2014 | 793 | 0.95 | 0.88 | 1.01 |
| Neonatal | Census Region 2: Midwest | 2015 | 869 | 1.04 | 0.97 | 1.11 |
| Neonatal | Census Region 2: Midwest | 2016 | 893 | 1.08 | 1.01 | 1.15 |
| Neonatal | Census Region 2: Midwest | 2017 | 849 | 1.05 | 0.98 | 1.12 |
| Neonatal | Census Region 2: Midwest | 2018 | 829 | 1.04 | 0.97 | 1.11 |
| Neonatal | Census Region 2: Midwest | 2019 | 769 | 0.98 | 0.91 | 1.05 |
| Neonatal | Census Region 2: Midwest | 2020 | 786 | 1.04 | 0.97 | 1.11 |
| Neonatal | Census Region 3: South | 1999 | 2199 | 1.53 | 1.47 | 1.59 |
| Neonatal | Census Region 3: South | 2000 | 2117 | 1.42 | 1.36 | 1.48 |
| Neonatal | Census Region 3: South | 2001 | 2102 | 1.42 | 1.36 | 1.48 |
| Neonatal | Census Region 3: South | 2002 | 2129 | 1.44 | 1.38 | 1.5 |
| Neonatal | Census Region 3: South | 2003 | 2104 | 1.4 | 1.34 | 1.46 |
| Neonatal | Census Region 3: South | 2004 | 2105 | 1.38 | 1.32 | 1.44 |
| Neonatal | Census Region 3: South | 2005 | 2152 | 1.39 | 1.33 | 1.45 |
| Neonatal | Census Region 3: South | 2006 | 2326 | 1.44 | 1.38 | 1.5 |
| Neonatal | Census Region 3: South | 2007 | 2166 | 1.32 | 1.26 | 1.37 |
| Neonatal | Census Region 3: South | 2008 | 1978 | 1.22 | 1.17 | 1.28 |
| Neonatal | Census Region 3: South | 2009 | 1889 | 1.2 | 1.14 | 1.25 |
| Neonatal | Census Region 3: South | 2010 | 1681 | 1.1 | 1.05 | 1.16 |
| Neonatal | Census Region 3: South | 2011 | 1631 | 1.08 | 1.03 | 1.14 |
| Neonatal | Census Region 3: South | 2012 | 1629 | 1.08 | 1.03 | 1.13 |
| Neonatal | Census Region 3: South | 2013 | 1763 | 1.17 | 1.11 | 1.22 |
| Neonatal | Census Region 3: South | 2014 | 1703 | 1.11 | 1.05 | 1.16 |
| Neonatal | Census Region 3: South | 2015 | 1712 | 1.11 | 1.05 | 1.16 |
| Neonatal | Census Region 3: South | 2016 | 1783 | 1.16 | 1.11 | 1.22 |
| Neonatal | Census Region 3: South | 2017 | 1745 | 1.16 | 1.11 | 1.21 |
| Neonatal | Census Region 3: South | 2018 | 1760 | 1.18 | 1.13 | 1.24 |
| Neonatal | Census Region 3: South | 2019 | 1698 | 1.15 | 1.09 | 1.2 |
| Neonatal | Census Region 3: South | 2020 | 1636 | 1.14 | 1.08 | 1.19 |
| Neonatal | Census Region 4: West | 1999 | 1006 | 1.06 | 0.99 | 1.12 |
| Neonatal | Census Region 4: West | 2000 | 1053 | 1.07 | 1.01 | 1.14 |
| Neonatal | Census Region 4: West | 2001 | 965 | 0.99 | 0.93 | 1.05 |
| Neonatal | Census Region 4: West | 2002 | 965 | 0.98 | 0.92 | 1.04 |
| Neonatal | Census Region 4: West | 2003 | 901 | 0.89 | 0.84 | 0.95 |
| Neonatal | Census Region 4: West | 2004 | 1023 | 1 | 0.94 | 1.07 |
| Neonatal | Census Region 4: West | 2005 | 1010 | 0.98 | 0.92 | 1.04 |
| Neonatal | Census Region 4: West | 2006 | 1001 | 0.94 | 0.88 | 0.99 |
| Neonatal | Census Region 4: West | 2007 | 1025 | 0.95 | 0.89 | 1.01 |
| Neonatal | Census Region 4: West | 2008 | 934 | 0.88 | 0.82 | 0.94 |
| Neonatal | Census Region 4: West | 2009 | 899 | 0.88 | 0.82 | 0.94 |
| Neonatal | Census Region 4: West | 2010 | 891 | 0.9 | 0.84 | 0.96 |
| Neonatal | Census Region 4: West | 2011 | 870 | 0.9 | 0.84 | 0.96 |
| Neonatal | Census Region 4: West | 2012 | 795 | 0.82 | 0.76 | 0.87 |
| Neonatal | Census Region 4: West | 2013 | 789 | 0.82 | 0.76 | 0.88 |
| Neonatal | Census Region 4: West | 2014 | 883 | 0.9 | 0.85 | 0.96 |
| Neonatal | Census Region 4: West | 2015 | 833 | 0.86 | 0.81 | 0.92 |
| Neonatal | Census Region 4: West | 2016 | 823 | 0.86 | 0.8 | 0.92 |
| Neonatal | Census Region 4: West | 2017 | 800 | 0.86 | 0.8 | 0.92 |
| Neonatal | Census Region 4: West | 2018 | 782 | 0.87 | 0.81 | 0.93 |
| Neonatal | Census Region 4: West | 2019 | 710 | 0.8 | 0.74 | 0.86 |
| Neonatal | Census Region 4: West | 2020 | 714 | 0.84 | 0.78 | 0.91 |
| Post-neonatal | Census Region 1: Northeast | 1999 | 404 | 0.59 | 0.53 | 0.65 |
| Post-neonatal | Census Region 1: Northeast | 2000 | 382 | 0.55 | 0.5 | 0.61 |
| Post-neonatal | Census Region 1: Northeast | 2001 | 365 | 0.53 | 0.48 | 0.59 |
| Post-neonatal | Census Region 1: Northeast | 2002 | 331 | 0.49 | 0.44 | 0.54 |
| Post-neonatal | Census Region 1: Northeast | 2003 | 320 | 0.47 | 0.41 | 0.52 |
| Post-neonatal | Census Region 1: Northeast | 2004 | 272 | 0.4 | 0.35 | 0.45 |
| Post-neonatal | Census Region 1: Northeast | 2005 | 262 | 0.39 | 0.34 | 0.44 |
| Post-neonatal | Census Region 1: Northeast | 2006 | 306 | 0.45 | 0.4 | 0.5 |
| Post-neonatal | Census Region 1: Northeast | 2007 | 354 | 0.52 | 0.46 | 0.57 |
| Post-neonatal | Census Region 1: Northeast | 2008 | 342 | 0.51 | 0.45 | 0.56 |
| Post-neonatal | Census Region 1: Northeast | 2009 | 277 | 0.42 | 0.37 | 0.47 |
| Post-neonatal | Census Region 1: Northeast | 2010 | 254 | 0.39 | 0.34 | 0.44 |
| Post-neonatal | Census Region 1: Northeast | 2011 | 250 | 0.39 | 0.34 | 0.44 |
| Post-neonatal | Census Region 1: Northeast | 2012 | 209 | 0.33 | 0.28 | 0.37 |
| Post-neonatal | Census Region 1: Northeast | 2013 | 201 | 0.32 | 0.27 | 0.36 |
| Post-neonatal | Census Region 1: Northeast | 2014 | 178 | 0.28 | 0.24 | 0.32 |
| Post-neonatal | Census Region 1: Northeast | 2015 | 191 | 0.3 | 0.26 | 0.35 |
| Post-neonatal | Census Region 1: Northeast | 2016 | 172 | 0.28 | 0.23 | 0.32 |
| Post-neonatal | Census Region 1: Northeast | 2017 | 194 | 0.32 | 0.27 | 0.36 |
| Post-neonatal | Census Region 1: Northeast | 2018 | 193 | 0.32 | 0.27 | 0.36 |
| Post-neonatal | Census Region 1: Northeast | 2019 | 217 | 0.36 | 0.31 | 0.41 |
| Post-neonatal | Census Region 1: Northeast | 2020 | 217 | 0.38 | 0.33 | 0.43 |
| Post-neonatal | Census Region 2: Midwest | 1999 | 844 | 0.96 | 0.89 | 1.02 |
| Post-neonatal | Census Region 2: Midwest | 2000 | 815 | 0.91 | 0.84 | 0.97 |
| Post-neonatal | Census Region 2: Midwest | 2001 | 795 | 0.9 | 0.83 | 0.96 |
| Post-neonatal | Census Region 2: Midwest | 2002 | 731 | 0.83 | 0.77 | 0.89 |
| Post-neonatal | Census Region 2: Midwest | 2003 | 607 | 0.68 | 0.63 | 0.74 |
| Post-neonatal | Census Region 2: Midwest | 2004 | 668 | 0.75 | 0.69 | 0.81 |
| Post-neonatal | Census Region 2: Midwest | 2005 | 679 | 0.76 | 0.71 | 0.82 |
| Post-neonatal | Census Region 2: Midwest | 2006 | 675 | 0.75 | 0.69 | 0.8 |
| Post-neonatal | Census Region 2: Midwest | 2007 | 607 | 0.67 | 0.62 | 0.72 |
| Post-neonatal | Census Region 2: Midwest | 2008 | 617 | 0.69 | 0.64 | 0.75 |
| Post-neonatal | Census Region 2: Midwest | 2009 | 568 | 0.65 | 0.6 | 0.71 |
| Post-neonatal | Census Region 2: Midwest | 2010 | 520 | 0.62 | 0.56 | 0.67 |
| Post-neonatal | Census Region 2: Midwest | 2011 | 491 | 0.59 | 0.54 | 0.64 |
| Post-neonatal | Census Region 2: Midwest | 2012 | 419 | 0.5 | 0.46 | 0.55 |
| Post-neonatal | Census Region 2: Midwest | 2013 | 388 | 0.47 | 0.42 | 0.51 |
| Post-neonatal | Census Region 2: Midwest | 2014 | 368 | 0.44 | 0.39 | 0.48 |
| Post-neonatal | Census Region 2: Midwest | 2015 | 361 | 0.43 | 0.39 | 0.48 |
| Post-neonatal | Census Region 2: Midwest | 2016 | 403 | 0.49 | 0.44 | 0.53 |
| Post-neonatal | Census Region 2: Midwest | 2017 | 367 | 0.45 | 0.41 | 0.5 |
| Post-neonatal | Census Region 2: Midwest | 2018 | 379 | 0.47 | 0.43 | 0.52 |
| Post-neonatal | Census Region 2: Midwest | 2019 | 328 | 0.42 | 0.37 | 0.46 |
| Post-neonatal | Census Region 2: Midwest | 2020 | 350 | 0.46 | 0.42 | 0.51 |
| Post-neonatal | Census Region 3: South | 1999 | 1349 | 0.94 | 0.89 | 0.99 |
| Post-neonatal | Census Region 3: South | 2000 | 1426 | 0.96 | 0.91 | 1.01 |
| Post-neonatal | Census Region 3: South | 2001 | 1327 | 0.9 | 0.85 | 0.95 |
| Post-neonatal | Census Region 3: South | 2002 | 1387 | 0.94 | 0.89 | 0.99 |
| Post-neonatal | Census Region 3: South | 2003 | 1343 | 0.89 | 0.84 | 0.94 |
| Post-neonatal | Census Region 3: South | 2004 | 1424 | 0.93 | 0.88 | 0.98 |
| Post-neonatal | Census Region 3: South | 2005 | 1388 | 0.9 | 0.85 | 0.94 |
| Post-neonatal | Census Region 3: South | 2006 | 1428 | 0.89 | 0.84 | 0.93 |
| Post-neonatal | Census Region 3: South | 2007 | 1454 | 0.89 | 0.84 | 0.93 |
| Post-neonatal | Census Region 3: South | 2008 | 1345 | 0.83 | 0.79 | 0.88 |
| Post-neonatal | Census Region 3: South | 2009 | 1277 | 0.81 | 0.76 | 0.85 |
| Post-neonatal | Census Region 3: South | 2010 | 1157 | 0.76 | 0.72 | 0.8 |
| Post-neonatal | Census Region 3: South | 2011 | 1023 | 0.68 | 0.64 | 0.72 |
| Post-neonatal | Census Region 3: South | 2012 | 968 | 0.64 | 0.6 | 0.68 |
| Post-neonatal | Census Region 3: South | 2013 | 883 | 0.59 | 0.55 | 0.62 |
| Post-neonatal | Census Region 3: South | 2014 | 987 | 0.64 | 0.6 | 0.68 |
| Post-neonatal | Census Region 3: South | 2015 | 1016 | 0.66 | 0.62 | 0.7 |
| Post-neonatal | Census Region 3: South | 2016 | 929 | 0.61 | 0.57 | 0.64 |
| Post-neonatal | Census Region 3: South | 2017 | 890 | 0.59 | 0.55 | 0.63 |
| Post-neonatal | Census Region 3: South | 2018 | 851 | 0.57 | 0.53 | 0.61 |
| Post-neonatal | Census Region 3: South | 2019 | 811 | 0.55 | 0.51 | 0.59 |
| Post-neonatal | Census Region 3: South | 2020 | 856 | 0.6 | 0.56 | 0.64 |
| Post-neonatal | Census Region 4: West | 1999 | 703 | 0.74 | 0.68 | 0.79 |
| Post-neonatal | Census Region 4: West | 2000 | 613 | 0.63 | 0.58 | 0.68 |
| Post-neonatal | Census Region 4: West | 2001 | 494 | 0.51 | 0.46 | 0.55 |
| Post-neonatal | Census Region 4: West | 2002 | 602 | 0.61 | 0.56 | 0.66 |
| Post-neonatal | Census Region 4: West | 2003 | 552 | 0.55 | 0.5 | 0.59 |
| Post-neonatal | Census Region 4: West | 2004 | 566 | 0.56 | 0.51 | 0.6 |
| Post-neonatal | Census Region 4: West | 2005 | 524 | 0.51 | 0.46 | 0.55 |
| Post-neonatal | Census Region 4: West | 2006 | 512 | 0.48 | 0.44 | 0.52 |
| Post-neonatal | Census Region 4: West | 2007 | 579 | 0.54 | 0.49 | 0.58 |
| Post-neonatal | Census Region 4: West | 2008 | 544 | 0.51 | 0.47 | 0.55 |
| Post-neonatal | Census Region 4: West | 2009 | 559 | 0.55 | 0.5 | 0.59 |
| Post-neonatal | Census Region 4: West | 2010 | 475 | 0.48 | 0.44 | 0.53 |
| Post-neonatal | Census Region 4: West | 2011 | 452 | 0.47 | 0.42 | 0.51 |
| Post-neonatal | Census Region 4: West | 2012 | 399 | 0.41 | 0.37 | 0.45 |
| Post-neonatal | Census Region 4: West | 2013 | 395 | 0.41 | 0.37 | 0.45 |
| Post-neonatal | Census Region 4: West | 2014 | 351 | 0.36 | 0.32 | 0.4 |
| Post-neonatal | Census Region 4: West | 2015 | 341 | 0.35 | 0.32 | 0.39 |
| Post-neonatal | Census Region 4: West | 2016 | 332 | 0.35 | 0.31 | 0.38 |
| Post-neonatal | Census Region 4: West | 2017 | 322 | 0.35 | 0.31 | 0.39 |
| Post-neonatal | Census Region 4: West | 2018 | 317 | 0.35 | 0.31 | 0.39 |
| Post-neonatal | Census Region 4: West | 2019 | 308 | 0.35 | 0.31 | 0.39 |
| Post-neonatal | Census Region 4: West | 2020 | 293 | 0.35 | 0.31 | 0.39 |
| **Cohort** | **Lower Endpoint** | **Upper Endpoint** | **APC** | **Lower 95%CI** | **Upper 95%CI** | **P-value** |
| Neonatal / Census Region 1: Northeast - 1 Joinpoint | 1999 | 2016 | -2.3605* | -2.8854 | -1.8328 | < 0.000001 |
| Neonatal / Census Region 1: Northeast - 1 Joinpoint | 2016 | 2020 | 2.4345 | -3.3331 | 8.5463 | 0.393404 |
| Neonatal / Census Region 2: Midwest - 1 Joinpoint | 1999 | 2011 | -2.6528* | -3.1482 | -2.1549 | < 0.000001 |
| Neonatal / Census Region 2: Midwest - 1 Joinpoint | 2011 | 2020 | 0.9921* | 0.1208 | 1.871 | 0.02791 |
| Neonatal / Census Region 3: South - 2 Joinpoints | 1999 | 2006 | -0.7762 | -1.6451 | 0.1004 | 0.078214 |
| Neonatal / Census Region 3: South - 2 Joinpoints | 2006 | 2010 | -5.6557* | -9.142 | -2.0357 | 0.005094 |
| Neonatal / Census Region 3: South - 2 Joinpoints | 2010 | 2020 | 0.5661 | -0.0922 | 1.2287 | 0.0865 |
| Neonatal / Census Region 4: West - 0 Joinpoints | 1999 | 2020 | -1.1113* | -1.3981 | -0.8236 | < 0.000001 |
| Post-neonatal / Census Region 1: Northeast - 3 Joinpoints | 1999 | 2005 | -6.5067* | -8.3364 | -4.6405 | 0.000012 |
| Post-neonatal / Census Region 1: Northeast - 3 Joinpoints | 2005 | 2008 | 8.7851 | -5.3312 | 25.0063 | 0.209349 |
| Post-neonatal / Census Region 1: Northeast - 3 Joinpoints | 2008 | 2014 | -9.7773* | -12.5998 | -6.8638 | 0.000019 |
| Post-neonatal / Census Region 1: Northeast - 3 Joinpoints | 2014 | 2020 | 5.0130* | 2.3286 | 7.7679 | 0.001596 |
| Post-neonatal / Census Region 2: Midwest - 1 Joinpoint | 1999 | 2015 | -4.5672* | -5.2255 | -3.9042 | < 0.000001 |
| Post-neonatal / Census Region 2: Midwest - 1 Joinpoint | 2015 | 2020 | -0.2301 | -4.5864 | 4.325 | 0.914571 |
| Post-neonatal / Census Region 3: South - 2 Joinpoints | 1999 | 2007 | -0.5298 | -1.6461 | 0.5992 | 0.329869 |
| Post-neonatal / Census Region 3: South - 2 Joinpoints | 2007 | 2012 | -6.2571* | -9.3348 | -3.075 | 0.000979 |
| Post-neonatal / Census Region 3: South - 2 Joinpoints | 2012 | 2020 | -1.5307* | -2.9522 | -0.0884 | 0.039145 |
| Post-neonatal / Census Region 4: West - 0 Joinpoints | 1999 | 2020 | -3.1904* | -3.8183 | -2.5585 | < 0.000001 |
| **Cohort** | **Lower Endpoint** | **Upper Endpoint** | **AAPC** | **Lower 95%CI** | **Upper 95%CI** | **P-value** |
| Neonatal / Census Region 1: Northeast - 1 Joinpoint | 1999 | 2020 | -1.4648* | -2.5453 | -0.3723 | 0.008719 |
| Neonatal / Census Region 2: Midwest - 1 Joinpoint | 1999 | 2020 | -1.1071* | -1.5399 | -0.6724 | 0.000001 |
| Neonatal / Census Region 3: South - 2 Joinpoints | 1999 | 2020 | -1.0938* | -1.8462 | -0.3358 | 0.004753 |
| Neonatal / Census Region 4: West - 0 Joinpoints | 1999 | 2020 | -1.1113* | -1.3981 | -0.8236 | < 0.000001 |
| Post-neonatal / Census Region 1: Northeast - 3 Joinpoints | 1999 | 2020 | -2.2362* | -4.2808 | -0.1479 | 0.035976 |
| Post-neonatal / Census Region 2: Midwest - 1 Joinpoint | 1999 | 2020 | -3.5519* | -4.6093 | -2.4829 | < 0.000001 |
| Post-neonatal / Census Region 3: South - 2 Joinpoints | 1999 | 2020 | -2.3015* | -3.2433 | -1.3507 | 0.000002 |
| Post-neonatal / Census Region 4: West - 0 Joinpoints | 1999 | 2020 | -3.1904* | -3.8183 | -2.5585 | < 0.000001 |

**Supplementary Table 4**: Respiratory related mortality rates stratified by census in the United States 1999-2020. CR=Crude Rate; APC=Annual Percentage Change; AAPC=Average Annual Percentage Change; CI=Confidence Interval.
